# Supplementary material for: Agro-hydrology and multi-temporal high-resolution remote sensing: toward an explicit spatial processes calibration
Source: Copernicus journal article supplement (doi:10.5194/hess-18-5219-2014), 2014-12-16
Supplement: Supplementary file 1 [file hess-18-5219-2014-supplement-cover-letter.pdf › hess-18-5219-2014-supplement-cover-letter.pdf]

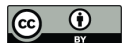

## *Supplement of*

# **Agro-hydrology and multi-temporal high-resolution remote sensing: toward an explicit spatial processes calibration**

**S. Ferrant et al.**

*Correspondence to:* S. Ferrant ([sylvain.ferrant@cesbio.cnes.fr](mailto:sylvain.ferrant@cesbio.cnes.fr))

- [hess-18-5219-2014-supplement-cover-letter.pdf](#)
- [Figure9animation.gif](#)
